# Supplementary material for: Physiologic Effects of the Awake Prone Position Combined With High-Flow Nasal Oxygen on Gas Exchange and Work of Breathing in Patients With Severe COVID-19 Pneumonia: A Randomized Crossover Trial
Source: PubMed Central journal article supplement — Crit Care Explor. 2022 Dec 14;4(12):e0805. doi: 10.1097/CCE.0000000000000805 (PMC9760623; doi:10.1097/cce.0000000000000805), 2022-12-14
Supplement: cc9-4-e0805-s001.pdf [file cc9-4-e0805-s001.pdf]

**Physiological effects of the awake prone position combined with high-flow nasal oxygen on gas exchange and work of breathing in patients with severe COVID-19 pneumonia: A randomized crossover trial.**

Samuel Lehingue; Jérôme Allardet-Servent; Anne Ferdani; Sami Hraeich; Jean-Marie Forel; Jean-Michel Arnal; Eloi Prud'homme; Guillaume Penaranda; Jeremy Bourenne; Olivier Monnet; Marc Gannier; Emmanuel Cantais.

**Supplemental Digital Content**

## Table of Content

|                                                                                                                                        |    |
|----------------------------------------------------------------------------------------------------------------------------------------|----|
| METHODS.....                                                                                                                           | 2  |
| Exclusion criteria .....                                                                                                               | 3  |
| High-flow nasal oxygen settings.....                                                                                                   | 3  |
| Study protocol.....                                                                                                                    | 3  |
| Prone and semirecumbent positioning.....                                                                                               | 4  |
| CT-based lung extension severity scale.....                                                                                            | 4  |
| Esophageal pressure measurement and related parameters .....                                                                           | 4  |
| Expiratory CO <sub>2</sub> measurement and related parameters .....                                                                    | 6  |
| Sample size calculation.....                                                                                                           | 6  |
| Adverse events .....                                                                                                                   | 6  |
| RESULTS.....                                                                                                                           | 7  |
| Gas flow and airway pressure estimation .....                                                                                          | 7  |
| Effect of APP on oxygenation in responders.....                                                                                        | 7  |
| Respiratory parameters associated with intubation .....                                                                                | 7  |
| REFERENCES .....                                                                                                                       | 8  |
| eTable 1. CT-based lung extension severity at study entry in the thirteen patients with available chest CT-scan. ....                  | 10 |
| eTable 2. Comparisons of physiological parameters measured at study entry in patients subsequently intubated and nonintubated.....     | 11 |
| eFigure 1. Flow chart and study design.....                                                                                            | 13 |
| eFigure 2. Time course of the PaO <sub>2</sub> /F <sub>I</sub> O <sub>2</sub> ratio among responders in the prone position (PP). ....  | 14 |
| eFigure 3. Effect of the semirecumbent (SRP) and prone (PP) positions on inspiratory muscle effort and transpulmonary pressure. ....   | 15 |
| eFigure 4. Box plot representation of physiologic parameters at study entry in intubated and nonintubated patients.....                | 16 |
| eFigure 5. Receiver operating characteristic curves of physiological parameters measured at study entry to predict the intubation..... | 17 |

## METHODS

### ***Exclusion criteria***

The exclusion criteria were one or more of the following: contraindication to APP (lack of mobility, agitation or risk of inhalation) or to esophageal balloon insertion; the immediate need for intubation or the presence of hypercapnia with an indication for noninvasive ventilation ( $\text{PaCO}_2 > 50$  mmHg), hemodynamic instability (systolic blood pressure  $< 90$  mm Hg or mean arterial pressure  $< 65$  mm Hg) and/or shock; a Glasgow Coma Scale score  $< 13$ ; pregnancy or breastfeeding; and patients deprived of liberty or without health insurance.

### ***High-flow nasal oxygen settings***

Following the recommendation of the national institutional review board (Comité de Protection des Personnes Nord Ouest, ID 20.05.26.63610), the gas flow of the high-flow nasal oxygen device (Airvo 2, Fisher & Paykel Healthcare) had to be set initially at 30 L/min regardless of the fraction of inspired oxygen ( $\text{F}_i\text{O}_2$ ). In case of poor tolerance by the patient, the committee consented to the investigators progressively incrementing the gas flow as clinically appropriate.  $\text{F}_i\text{O}_2$  was titrated to maintain peripheral oxygen saturation ( $\text{SpO}_2$ ) within the range of 92-97%.

### ***Study protocol***

The measurement at inclusion was obtained after a stabilization period of 10 minutes in the semirecumbent position SRP. Patients were then randomized to receive in a crossover order the prone position (PP) and the semirecumbent position (SRP) in a crossover order. Patients randomized to the first sequence (Arm A) received the PP first and then the SRP, whereas patients randomized to the second sequence (Arm B) received the SRP first and then the PP. Measurements were obtained prior to (Baselinebaseline) and at the end of each

period, both lasting 120 minutes. To prevent carryover, Aa 2-hour period of washout separated the first from the second study period to prevent carryover. The baseline of the first study period was obtained in the semirecumbent positionSRP after 10 minutes of stabilization following the measurement at inclusion. The baseline of the second study period was obtained in the semirecumbent positionSRP after 10 minutes of stabilization following the washout period.

### ***Prone and semirecumbent positioning***

The interventions were standardized: 1) In SRP, the patients were placed in a semirecumbent position with an angle of 30-45° between the trunk and legs; 2) In PP, the patients were laid horizontally without bed inclination and were encouraged to feel comfortable using pillows under their head and chest if necessary. The changes from one position to another were performed with the assistance of the medical staff to minimize the patient's effort. During the washout period the position was not standardized and was left at the discretion of the patient.

### ***CT-based lung extension severity scale***

To further characterize the extent of pneumonia, a radiologist blindly reviewed all of the available chest CT scans by using a 5-level semiquantitative scale based on the average percentage of the typical findings (ground-glass opacity and consolidation) in each of the five lobes: <10%; 10-25%; 25-50%; 50-75%; > 75% of involvement.

### ***Esophageal pressure measurement and related parameters***

Prior to randomization, a 5 French 95-mm length esophageal balloon catheter (Cooper Surgical, Trumbull, CT, USA) was inserted through one nostril at a depth of 38-42 cm and was inflated

with 1 ml of air to measure the esophageal pressure ( $P_{ES}$ ) (1, 2). To ensure reproducibility, the balloon was completely deflated before all of the measurements were taken by applying negative pressure, and then it was reinflated with 1 ml of air. The esophageal catheter was connected to the esophageal pressure port of an S1 ventilator (Hamilton Medical AG, Bonaduz, Suisse), which continuously displayed the  $P_{ES}$  waveform and allowed for the adjustment of the catheter's position if needed.

The  $P_{ES}$  signal was digitalized at 50 Hz and exported from the S1 ventilator to a laptop computer for delayed analysis using Acqknowledge 5.0 software (Biopac, Goleta, CA). All breaths were analyzed, and the results were averaged for each study step. We defined the start of inspiration at the instant of the  $P_{ES}$  initial decay and the end of inspiration at the point of  $P_{ES}$  at which 25% of the time had elapsed from its maximum deflection to return to baseline (assuming that the final part of the esophageal curve is simply due to chest wall relaxation) (1). Transpulmonary pressure was defined as the airway pressure minus the  $P_{ES}$ . We measured the following  $P_{ES}$ -related parameters: the respiratory rate per minute; inspiratory effort ( $\Delta P_{ES}$ , the negative inspiratory swing of  $P_{ES}$ ); simplified  $P_{ES}$  pressure–time product ( $sPTP_{ES}$ ) as a surrogate of the work of breathing (WOB) per breath (defined as the area under the curve of  $P_{ES}$  during the inspiration) and per minute (defined as the sum of the areas under the curve of  $P_{ES}$  during the inspiration over the recording time divided by the number of minutes of recording); dynamic end-expiratory transpulmonary pressure ( $P_{Lee}$ , defined as the difference between the airway pressure and  $P_{ES}$  at the end of expiration); dynamic end-inspiratory transpulmonary pressure ( $P_{Lei}$ , defined as the difference between the airway pressure and  $P_{ES}$  at the end of inspiration); and dynamic transpulmonary driving pressure ( $\Delta P_L$ , defined as the maximal positive swing of the transpulmonary pressure during inspiration).

### ***Expiratory CO<sub>2</sub> measurement and related parameters***

The exhaled CO<sub>2</sub> waveform, as a function of time, was digitalized at 50 Hz and exported from the S1 ventilator to a laptop computer for an offline analysis. The end-tidal partial pressure of CO<sub>2</sub> (EtCO<sub>2</sub>) was measured over the last five consecutive breathing cycles, and the results were averaged for each study step. We then computed the arterial to end-tidal CO<sub>2</sub> difference (PaCO<sub>2</sub> - EtCO<sub>2</sub>) by using the PaCO<sub>2</sub> that was obtained from the blood gas that was sampled prior to the patient breathing through the mouthpiece. Thereafter, we used the following predictive equation to estimate the physiological dead space to tidal volume ratio as an index of ventilatory inefficiency:  $V_D/V_T = 0.32 + 0.0106 (PaCO_2 - EtCO_2) + 0.003 (RR) + 0.0015 (age)$ , where RR was respiratory rate (3).

### ***Sample size calculation***

According to the results of previous studies, we hypothesized that the PaO<sub>2</sub>/F<sub>I</sub>O<sub>2</sub> ratio would be 30 mmHg higher at the end of PP than at the end of SRP. Assuming an individual standard deviation of 40 mmHg, an  $\alpha$  level of 5% and a  $\beta$  level of 20%, 16 patients were needed to reject the null hypothesis. Anticipating a dropout rate of approximately 10%, we extended the sample size to 18 patients.

### ***Adverse events***

Adverse events were defined as any device displacement or removal, desaturation was defined as SpO<sub>2</sub><90%, and hemodynamic instability was defined as a heart rate > 120/min or a systolic blood pressure < 90 mmHg for >1 minute.

## RESULTS

### *Gas flow and airway pressure estimation*

Among the studied population, the gas flow was maintained at 30 L/min in 10 patients (59%) and was increased to 40 L/min in 1 patient (6%), to 50 L/min in 4 patients (24%) and to 60 L/min in 2 patients (12%). We assumed that the airway pressure remained constant throughout the breathing cycle and depended on the airflow according to the following estimation: 1.5 cmH<sub>2</sub>O at 30 L/min, 2.2 cmH<sub>2</sub>O at 40 L/min and 3.1 cmH<sub>2</sub>O at 50 L/min or more (4). In this study, the median gas flow was 30 L/min (IQR, 30-50), providing a median airway pressure of 1.5 cmH<sub>2</sub>O (IQR, 1.5-3.1).

### *Effect of APP on oxygenation in responders*

The mixed model analysis identified significant variations in PaO<sub>2</sub>/FIO<sub>2</sub> with the position but not with the sequence or period. During PP, PaO<sub>2</sub>/FIO<sub>2</sub> increased above 20% in 11 patients (65%), and these patients were classified as responders. Among them, PaO<sub>2</sub>/FIO<sub>2</sub> was already significantly increased at 30 minutes compared to baseline ( $p < 0.05$ , eFig. 2) and did not further improve until the second hour. The variation in PaO<sub>2</sub>/FIO<sub>2</sub> among responders and nonresponders was 96 [15,195] and 14 [-17,26] Torr, respectively ( $p = 0.007$ ; Fig. 1c). The change in PaO<sub>2</sub>/FIO<sub>2</sub> during PP did not correlate with the baseline level ( $r = -0.31$ ,  $p = 0.23$ ).

### *Respiratory parameters associated with intubation*

The main physiological parameters that were recorded at study entry are displayed in eTable 2. Compared to the patients not requiring intubation, the five patients who were intubated during their ICU stay had lower PaO<sub>2</sub>/FIO<sub>2</sub> ( $p = 0.045$ ) and higher  $\Delta$ PES ( $p = 0.012$ ),  $\Delta$ PL ( $p = 0.011$ ) and

sPTPES per minute ( $p=0.048$ , eFig. 4). Among these parameters, the  $\Delta$ PES and sPTPES per minute had the highest AUC (0.855 for both) at the respective cutoff values of  $>11.4$  cmH<sub>2</sub>O ( $p=0.001$ ) and  $>233.4$  cmH<sub>2</sub>O.s.min<sup>-1</sup> ( $p=0.006$ ; eFig. 5).

## REFERENCES

1. Grieco DL, Menga LS, Raggi V, et al.: Physiological Comparison of High-Flow Nasal Cannula and Helmet Noninvasive Ventilation in Acute Hypoxemic Respiratory Failure. *Am J Respir Crit Care Med* 2020; 201:303–312
2. Mojoli F, Chiumello D, Pozzi M, et al.: Esophageal pressure measurements under different conditions of intrathoracic pressure. An in vitro study of second generation balloon catheters. *Minerva Anestesiologica* 2015; 81:10
3. Frankenfield DC, Alam S, Bekteshi E, et al.: Predicting dead space ventilation in critically ill patients using clinically available data. *Crit Care Med* 2010; 38:288–291
4. Parke RL, McGuinness SP: Pressures Delivered By Nasal High Flow Oxygen During All Phases of the Respiratory Cycle. *Respiratory Care* 2013; 58:1621–1624





**eTable 1. CT-based lung extension severity at study entry in the thirteen patients with available chest CT-scan.**

| <b>Variables, units</b>                       | <b>Overall<br/>n=13</b> | <b>PP first<br/>n=7</b> | <b>SRP first<br/>n=6</b> |
|-----------------------------------------------|-------------------------|-------------------------|--------------------------|
| CT-based lung extension severity scale, n (%) |                         |                         |                          |
| < 10% of the total lung volume                | 1 (8)                   | 0                       | 1 (17)                   |
| 10 to 25% of the total lung volume            | 0                       | 0                       | 0                        |
| 25 to 50% of the total lung volume            | 4 (31)                  | 3 (43)                  | 1 (17)                   |
| 50 to 75% of the total lung volume            | 7 (54)                  | 4 (57)                  | 3 (50)                   |
| 75% of the total lung volume                  | 1 (8)                   | 0                       | 1 (17)                   |

**eTable 2. Comparisons of physiological parameters measured at study entry in patients subsequently intubated and nonintubated.**

| Variables, units                                                    | Overall<br>(n=17) | Intubated<br>(n=5) | Nonintubated<br>(n=12) | P Values |
|---------------------------------------------------------------------|-------------------|--------------------|------------------------|----------|
| Gas flow, L/min                                                     | 30 (30,50)        | 50 (50,60)         | 30 (30,33)             | 0.015    |
| pH <sub>a</sub>                                                     | 7.45 (7.44,7.50)  | 7.44 (7.44,7.44)   | 7.47 (7.44,7.50)       | 0.363    |
| P <sub>a</sub> O <sub>2</sub> , mmHg                                | 69.5 (64,85.1)    | 65.6 (57,63)       | 77.5 (65.9,109)        | 0.011    |
| F <sub>I</sub> O <sub>2</sub>                                       | 0.8 (0.7,0.9)     | 0.94 (0.9,1)       | 0.7 (0.7,0.9)          | 0.118    |
| P <sub>a</sub> O <sub>2</sub> /F <sub>I</sub> O <sub>2</sub> , mmHg | 93 (73,126)       | 63 (58,79)         | 99 (79,205)            | 0.045    |
| P <sub>a</sub> CO <sub>2</sub> , mmHg                               | 32 (30,33)        | 32.4 (32,33)       | 32.0 (29.5,33.1)       | 0.699    |
| E <sub>T</sub> CO <sub>2</sub> , mmHg                               | 30.4 (26.8,31.4)  | 29.0 (26.4,31.2)   | 30.6 (27.6,32.7)       | 0.671    |
| V <sub>D</sub> /V <sub>T</sub>                                      | 0.53 (0.47,0.58)  | 0.58(0.53,0.59)    | 0.49 (0.47,0.55)       | 0.154    |
| Borg dyspnea scale, VAS                                             | 29 (15,50)        | 29 (28.0,53)       | 27.5 (11.8,46.3)       | 0.288    |
| RR, breaths/min                                                     | 25 (20,32)        | 32.0 (25.0,42.0)   | 23.0 (20,30.5)         | 0.104    |
| ΔP <sub>ES</sub> , cmH <sub>2</sub> O*                              | 10.9 (7.4,14.9)   | 16.6 (12.5,20.6)   | 7.98 (6.82,11.3)       | 0.012    |
| ΔP <sub>L</sub> , cmH <sub>2</sub> O*                               | 10.9 (6.8,14.9)   | 16.6 (12.5,20.6)   | 7.54 (6.41,11.3)       | 0.011    |
| sPTP <sub>ES</sub> /breath, cmH <sub>2</sub> O.s*                   | 6.1 (4.6,11.3)    | 11.7 (6.3,12.1)    | 5.6 (4.2,10.8)         | 0.1981   |
| sPTP <sub>ES</sub> /min, cmH <sub>2</sub> O.s/min*                  | 215 (145,273)     | 330 (264,338)      | 201 (142,227)          | 0.048    |

*Definition of abbreviations:* pHa = arterial pH; PaO<sub>2</sub> = arterial oxygen tension; F<sub>I</sub>O<sub>2</sub> = fraction of inspired oxygen; PaO<sub>2</sub>/F<sub>I</sub>O<sub>2</sub> = ratio of arterial oxygen tension by inspired oxygen fraction; PaCO<sub>2</sub> = arterial carbon dioxide tension; E<sub>T</sub>CO<sub>2</sub> = end-tidal carbon dioxide tension; V<sub>D</sub>/V<sub>T</sub> = dead space fraction of ventilation; VAS= visual analog scales with values ranging from 0 (minimal) to 100 (maximal); ΔP<sub>ES</sub> = delta of esophageal pressure between end-expiratory and end-inspiratory values; ΔP<sub>L</sub> = delta of transpulmonary pressure (airway minus esophageal) between end-inspiratory and end-expiratory values; sPTP<sub>ES</sub>/breath = simplified esophageal pressure time product per breath; sPTP<sub>ES</sub>/min = simplified esophageal pressure time product per minute.

Data are expressed as the median (interquartile range 25-75%).

The intubated and nonintubated patients were compared using Mann–Whitney U tests.

\* The respiratory mechanic parameters of the nonintubated group were available in 11 patients.

**eFigure 1. Flow chart and study design.**

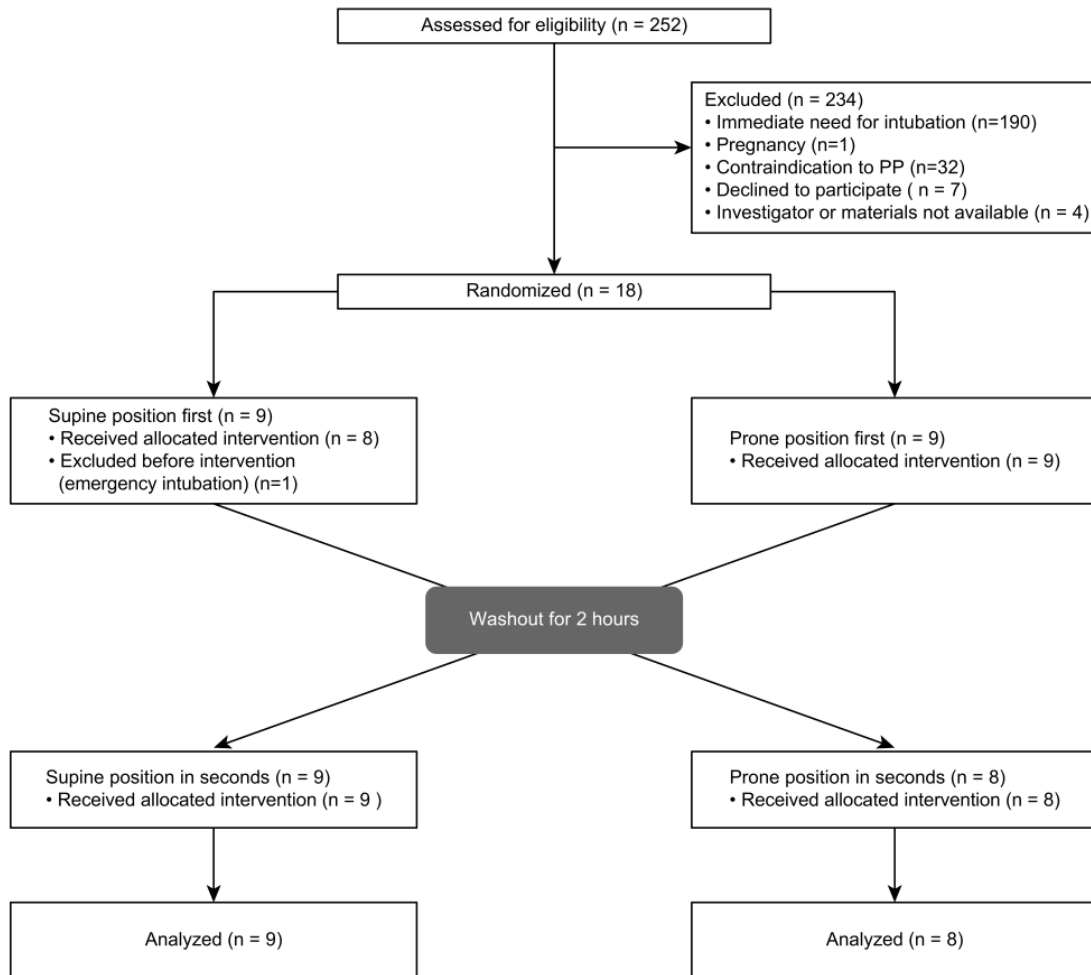

eFigure 2. Time course of the PaO<sub>2</sub>/F<sub>1</sub>O<sub>2</sub> ratio among responders in the prone position (PP).

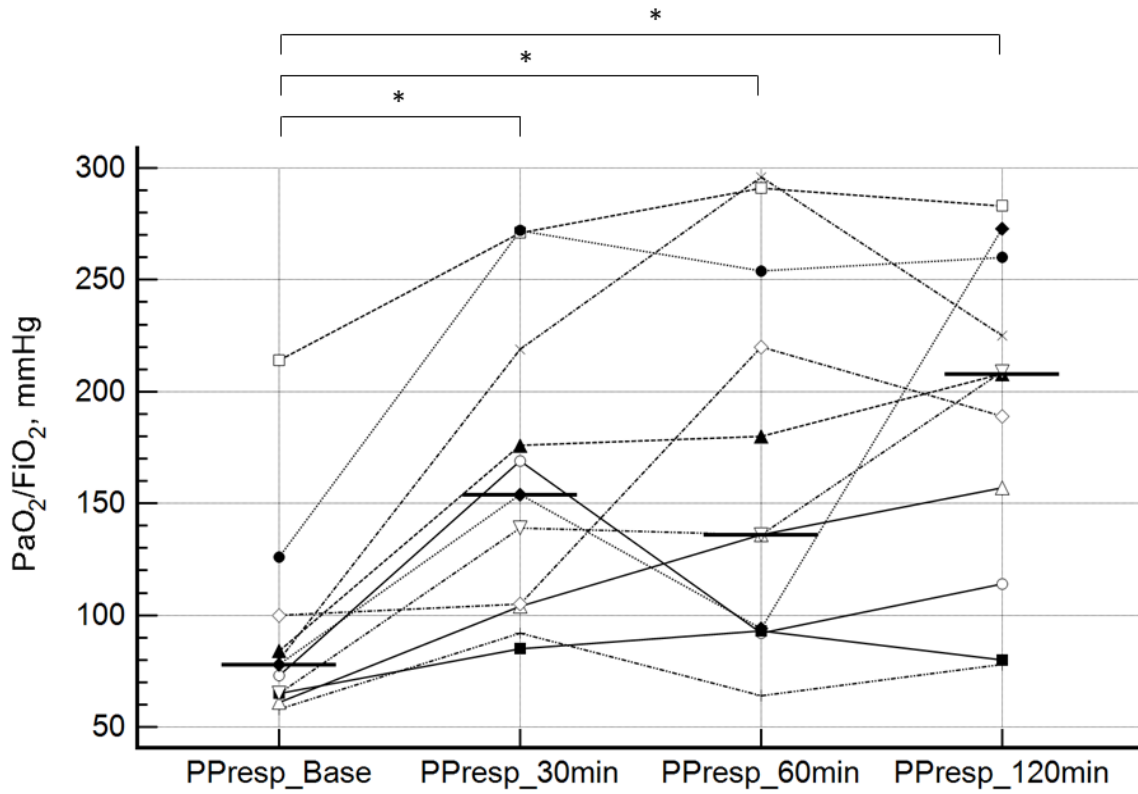

The horizontal bars indicate the median values.

\* P value < 0.05.

**eFigure 3. Effect of the semirecumbent (SRP) and prone (PP) positions on inspiratory muscle effort and transpulmonary pressure.**

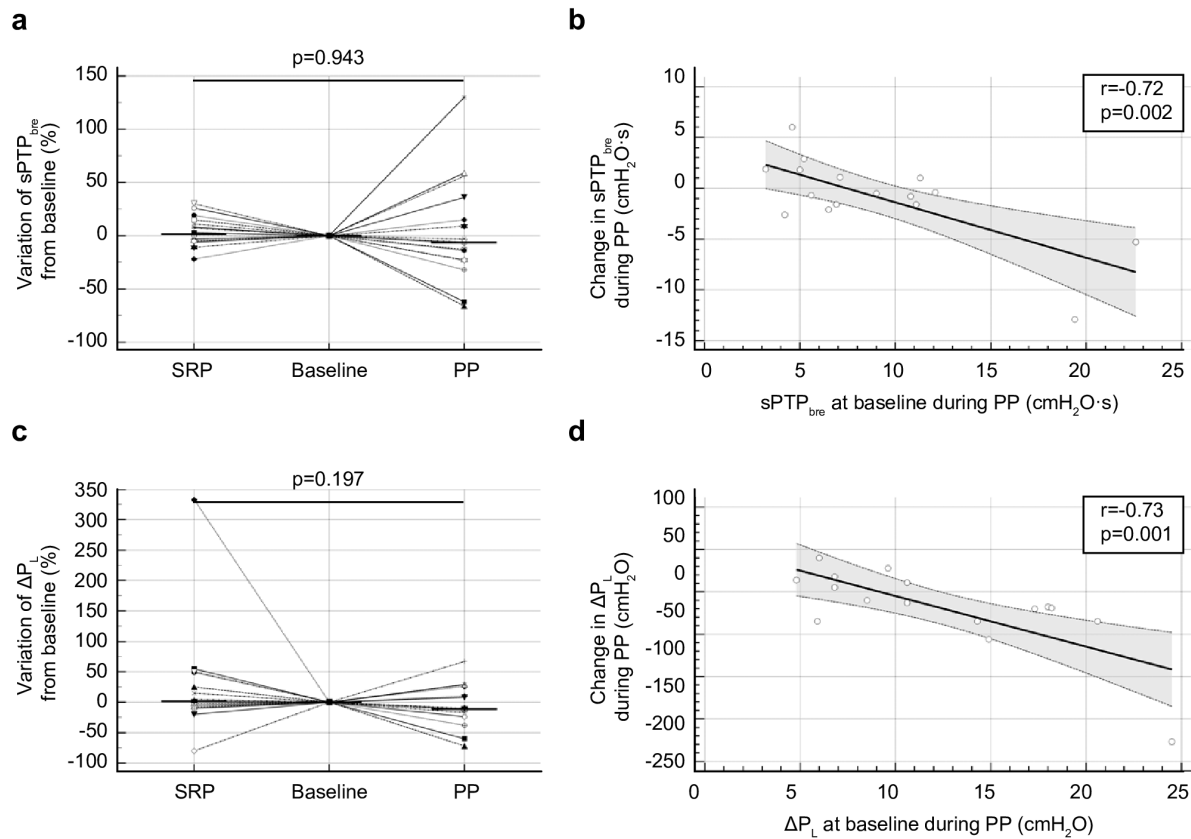

**a:** Dot plots and lines of the relative variation of the simplified esophageal pressure–time product per breath (sPTP<sub>bre</sub>) during SRP and PP computed as  $100 \times (\text{End Value} - \text{Baseline Value}) / \text{Baseline Value}$ . The baseline of each period was normalized to the reference level (zero). The horizontal bars indicate the median values. **b:** Scatter plot and regression between the baseline sPTP<sub>bre</sub> and the relative variation of sPTP<sub>bre</sub> during PP. The dashed lines indicate the 95% confidence interval of the regression line. **c:** Dot plots and lines of the relative variation of the transpulmonary pressure swing ( $\Delta P_L$ ) during SRP and PP. The baseline of each period was normalized to the reference level (zero). The horizontal bars indicate the median values. **d:** Scatter plot and regression between the baseline  $\Delta P_L$  and the relative variation of the  $\Delta P_L$  during PP. The dashed lines indicate the 95% confidence interval of the regression line.

**eFigure 4. Box plot representation of physiologic parameters at study entry in intubated and nonintubated patients.**

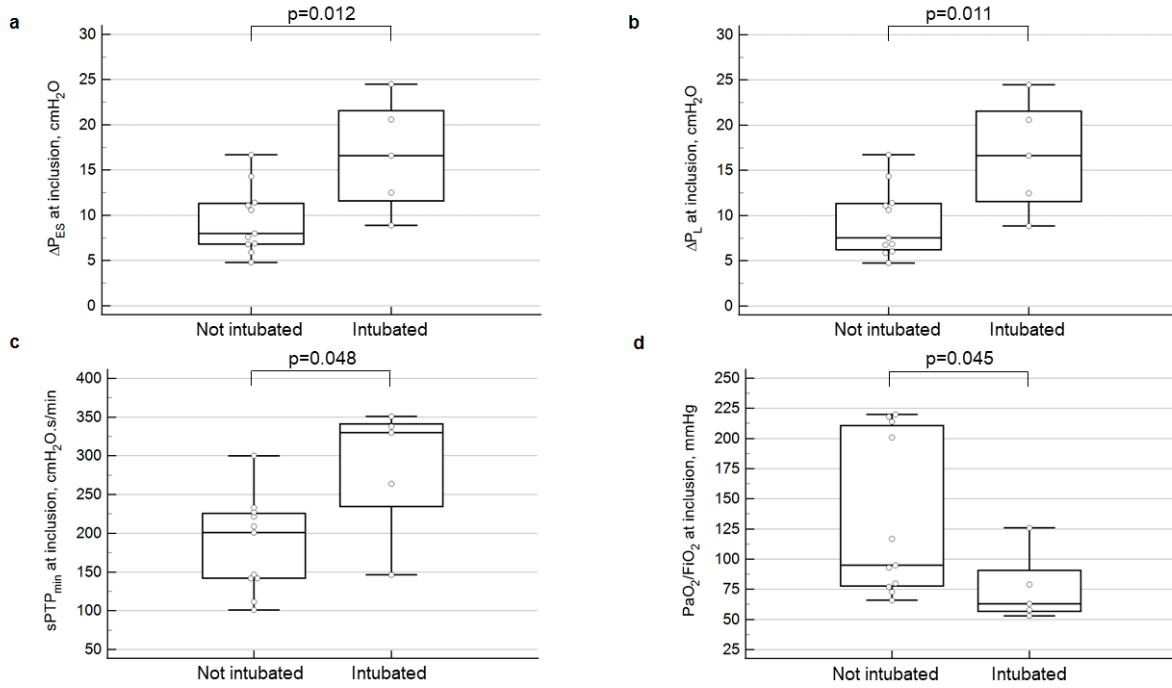

**a:** Esophageal pressure swing ( $\Delta P_{ES}$ ). **b:** Transpulmonary pressure swing ( $\Delta P_L$ ). **c:** Esophageal pressure–time product per minute (sPTP<sub>ES</sub> min). **d:** PaO<sub>2</sub>/F<sub>i</sub>O<sub>2</sub> ratio.



**eFigure 5. Receiver operating characteristic curves of physiological parameters measured at study entry to predict the intubation.**

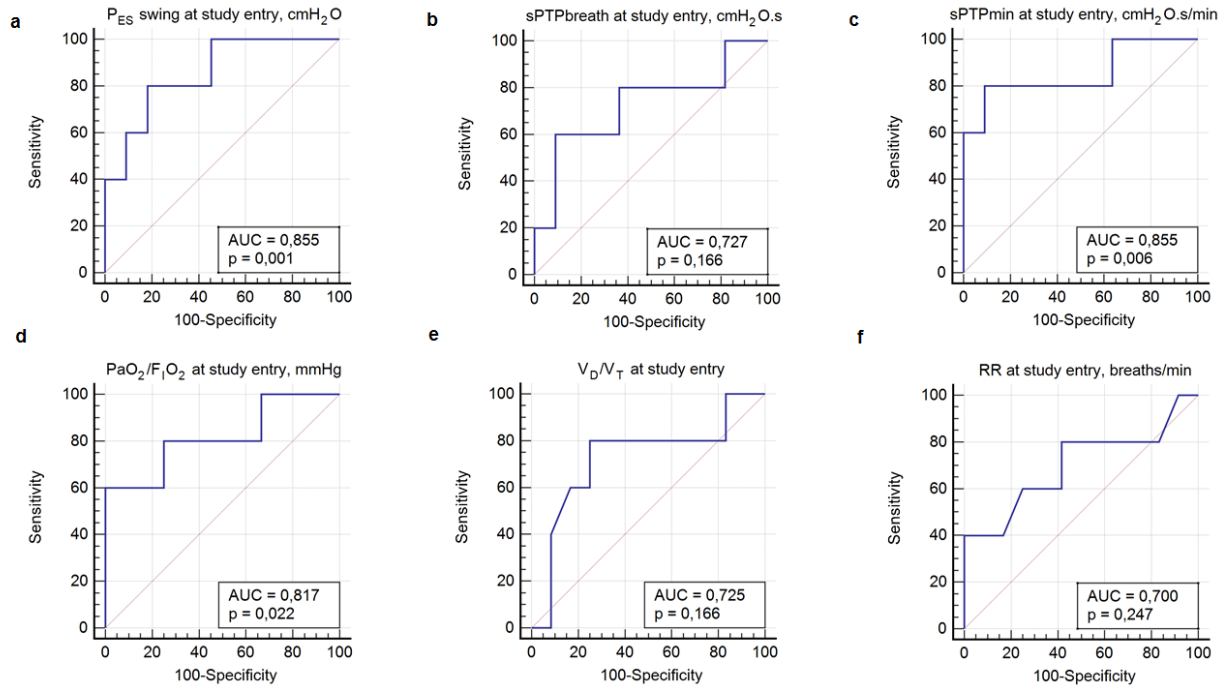

**a:** Esophageal pressure swing ( $\Delta P_{ES}$ ). **b:** Esophageal pressure–time product per breath (sPTP<sub>ES</sub> breath). **c:** Esophageal pressure–time product per minute (sPTP<sub>ES</sub> min). **d:** PaO<sub>2</sub>/F<sub>I</sub>O<sub>2</sub> ratio. **e:**

Physiolog
